# Supplementary material for: Effect of N-methyl-d-aspartate receptor enhancing agents on cognition in dementia: an exploratory systematic review and meta-analysis of randomized controlled trials
Source: PubMed Central journal article supplement (PMC8626464; doi:10.1038/s41598-021-02040-5), 2021-11-26
Supplement: 41598_2021_2040_MOESM2_ESM.pdf [file 41598_2021_2040_MOESM2_ESM.pdf]

**Supplementary Table S2.** Summary of the characteristics of studies included in the meta-analysis.

| Study (first author, year) | Dementia severity                            | Anti-dementia drugs                                   | Adjunctive or combined treatments                                    | Attrition rates | Quality assessment (Jadad score) | Illness duration   | Education       | Side effects                                                                                                                                                                                                                                                                                                                                           | Side effect rate                                                                                                 |
|----------------------------|----------------------------------------------|-------------------------------------------------------|----------------------------------------------------------------------|-----------------|----------------------------------|--------------------|-----------------|--------------------------------------------------------------------------------------------------------------------------------------------------------------------------------------------------------------------------------------------------------------------------------------------------------------------------------------------------------|------------------------------------------------------------------------------------------------------------------|
| Howard et al, 2020         | mild (MMSE 24 to 30)                         | NR                                                    | NR                                                                   | 0.49            | 4                                | 23.59±18.04 months | NR              | Dermatologic symptoms (hyperpigmentation, photosensitivity, rash), gastrointestinal symptoms (diarrhea, nausea, sore mouth, vomiting), neurologic symptoms (headache, visual or auditory disturbances, dizziness), infections (oral or genital candidiasis, vaginitis, anal irritation, bacterial enteritis, staphylococcal, or Clostridium difficile) | serious adverse events: placebo group (58.7%, 105/179 patients) v.s. Minocycline group (40.3%, 147/365 patients) |
| Bernard et al, 2019        | mild to moderate (MMSE 15 to 24)             | Donepezil                                             | none                                                                 | 0.09            | 4                                | 3.60±2.20 years    | NR              | Nasopharyngitis, blood creatine phosphokinase increased, diarrhea, fall, headache, type 2 diabetes mellitus, abdominal pain upper                                                                                                                                                                                                                      | placebo group (50.4%, 65/129 patients) v.s. S47445 group (45.3%, 177/391 patients)                               |
| Lin et al, 2019            | mild to severe (MMSE 5 to 26)                | Donepezil<br>Rivastigmine<br>Galantamine<br>Memantine | Quetiapine<br>Risperidone<br>Olanzapine<br>Aripiprazole<br>Sulpiride | 0.13            | 3                                | 2.05 years         | 4.70±4.10 years | One benzoate recipient reported mild and brief polyuria; one placebo receiver experienced moderate tension sensation.                                                                                                                                                                                                                                  | placebo group (2.1%, 1/48 patients) v.s. benzoate group (2.0%, 1/49 patients)                                    |
| Kouzuki et al, 2019        | moderate                                     | NR                                                    | NR                                                                   | 0.14            | 3                                | NR                 | NR              | NR                                                                                                                                                                                                                                                                                                                                                     | NR                                                                                                               |
| Lin et al, 2014            | mild (CDR 0.5 to 1)                          | Donepezil<br>Rivastigmine<br>Galantamine              | none                                                                 | 0.1             | 3                                | 13.90±16.79 months | 6.70±4.96 years | Only one patient in the placebo group reported dizziness at week 16.                                                                                                                                                                                                                                                                                   | placebo group (3.3%, 1/30 patients) v.s. benzoate group (0%, 0/30 patients)                                      |
| Tsai et al, 2014           | mild to moderate                             | NR                                                    | NR                                                                   | 0.17            | 3                                | 2.35±1.83 years    | 7.40±5.54 years | dizziness, hypersomnia                                                                                                                                                                                                                                                                                                                                 | placebo group (6.7%, 1/15 patients) v.s. Sarcosine group (6.7%, 1/15 patients)                                   |
| Chappell et al, 2007       | mild to moderate (MMSE 14 to 18 or 19 to 24) | none                                                  | SSRI,<br>trazodone,<br>lorazepam                                     | 0.08            | 5                                | NR                 | NR              | nausea and insomnia                                                                                                                                                                                                                                                                                                                                    | placebo group (61.5%, 56/91 patients) v.s. LY451395 group (61.1%, 55/90 patients)                                |
| Adair et al, 2001          | NR                                           | none                                                  | none                                                                 | 0.09            | 3                                | NR                 | NR              | Fatigue, headache, appetite change, mood change, muscle ache/cramp, diarrhea, dizziness, arthralgia, abnormal dreams, rash                                                                                                                                                                                                                             | placebo group (0 to 16.7%) v.s. N-acetylcysteine group (4.3 to 26.1%)                                            |
| Tsai et al, 1999           | NR                                           | NR                                                    | NR                                                                   | 0               | 3                                | NR                 | NR              | none                                                                                                                                                                                                                                                                                                                                                   | 0%                                                                                                               |

|                             |                                  |    |    |      |   |    |                  |                                                                                                      |                                                                |
|-----------------------------|----------------------------------|----|----|------|---|----|------------------|------------------------------------------------------------------------------------------------------|----------------------------------------------------------------|
| <b>Tsai et al, 1998</b>     | mild to moderate (MMSE 10 to 25) | NR | NR | 0    | 3 | NR | NR               | none                                                                                                 | 0%                                                             |
| <b>Schwartz et al, 1996</b> | mild to moderate (MMSE 12 to 24) | NR | NR | 0.16 | 3 | NR | 13.22±2.89 years | NR                                                                                                   | NR                                                             |
| <b>Mohr et al, 1995</b>     | mild to severe (MMSE 12 to 24)   | NR | NR | NR   | 3 | NR | NR               | upper respiratory tract infections, headache, accidental injury, agitation, arthritis, and confusion | NR                                                             |
| <b>Fakouhi et al, 1995</b>  | mild to moderate (MMSE 12 to 27) | NR | NR | 0.34 | 3 | NR | 12.60±3.00 years | upper respiratory tract infections, headache, accidental injury, agitation, arthritis, and confusion | NR                                                             |
| <b>Randolph et al, 1994</b> | mild to moderate (MMSE 15 to 25) | NR | NR | 0    | 3 | NR | NR               | transient agitated-confusional state                                                                 | placebo group (0%, 0/12) v.s. D-Cycloserine group (8.3%, 1/12) |

Abbreviations: CDR, Clinical Dementia Rating; MMSE, Mini-Mental Status Examination; NR, no reported.

The MMSE ranges were 0-10 for severe dementia, 11-20 for moderate, 21-25 for mild, 26-29 for questionable, and 30 for no.
